# Supplementary material for: Neighbouring effects on catalytic epoxidation by Fe-cyclam in M2-PDIxCy complexes
Source: Royal Society of Chemistry journal article supplement (doi:10.1039/d0dt03758c), 2020-01-01
Supplement: d0dt03758c1.pdf [file d0dt03758c1.pdf]

## Supplementary Information

### Neighbouring effects on catalytic epoxidation by Fe-cyclam in $M_2$ -PDIXCy complexes

Andreas J. Hofmann,<sup>a</sup> Lukas Niederegger<sup>a</sup> and Corinna R. Hess\*<sup>a</sup>

<sup>a</sup>Department of Chemistry and Catalysis Research Center, Technische Universität München (TUM), Lichtenbergstraße 4, Garching 85748, Germany

Email: corinna.hess@ch.tum.de

## Table of contents

|                                                                                |    |
|--------------------------------------------------------------------------------|----|
| ESI-MS data for [Fe(PDIeCy)](OTf) <sub>2</sub> .....                           | 3  |
| Absorption spectrum of [Fe(PDIeCy)](OTf) <sub>2</sub> .....                    | 4  |
| <sup>1</sup> H NMR spectra of compounds <b>3</b> , <b>4</b> and <b>5</b> ..... | 5  |
| Molecular structures of <b>4</b> and <b>5</b> .....                            | 9  |
| <sup>1</sup> H NMR spectroscopy of <b>5</b> with hydrogen peroxide .....       | 10 |
| Absorption spectrum of <b>3</b> with hydrogen peroxide .....                   | 11 |
| Catalytic epoxidation studies .....                                            | 12 |
| Results of epoxidation assays.....                                             | 13 |
| Product analysis.....                                                          | 15 |
| Crystallographic tables.....                                                   | 18 |
| References .....                                                               | 20 |

ESI-MS data for  $[\text{Fe}(\text{PDleCy})](\text{OTf})_2$

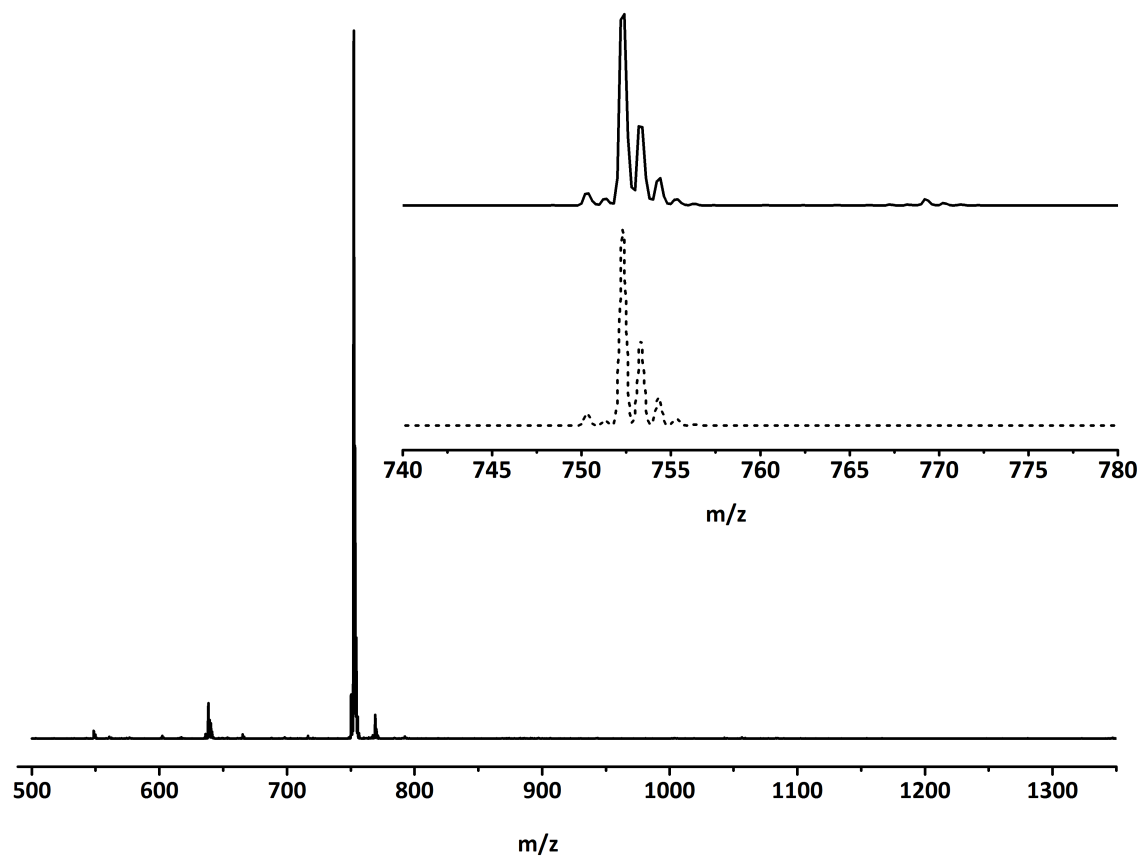

**Fig. S1** ESI-MS data for the monometallic  $[\text{Fe}(\text{PDleCy})](\text{OTf})_2$ ; ( $m/z$ : 752.3  $[\text{M}-(\text{OTf})]^+$ ). The data shows no mass signal corresponding to a bimetallic complex.

## Absorption spectrum of [Fe(PDIeCy)](OTf)<sub>2</sub>

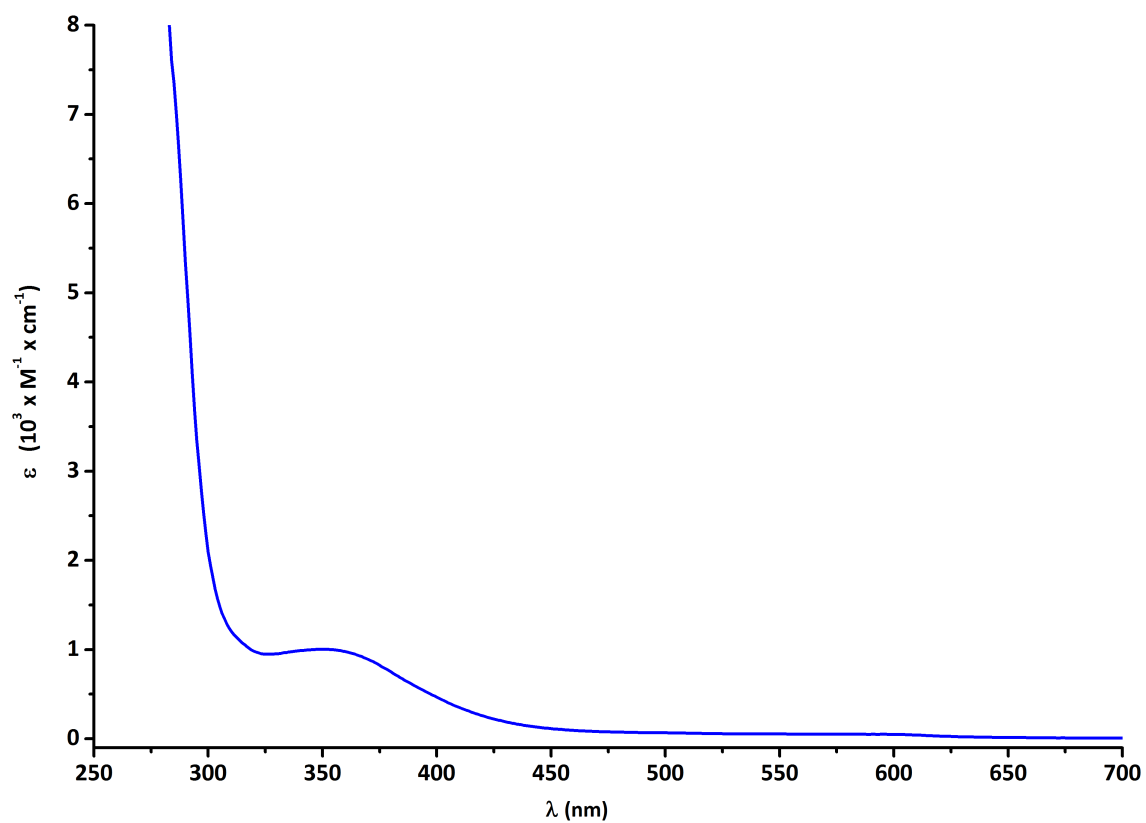

**Fig. S2** Absorption spectrum of the monometallic [Fe(PDIeCy)](OTf)<sub>2</sub> in MeCN at room temperature;  $\lambda_{max}(\epsilon) = 351$  nm ( $995 \text{ mol}^{-1}\text{dm}^3\text{cm}^{-1}$ ).

<sup>1</sup>H NMR spectra of compounds 3, 4 and 5

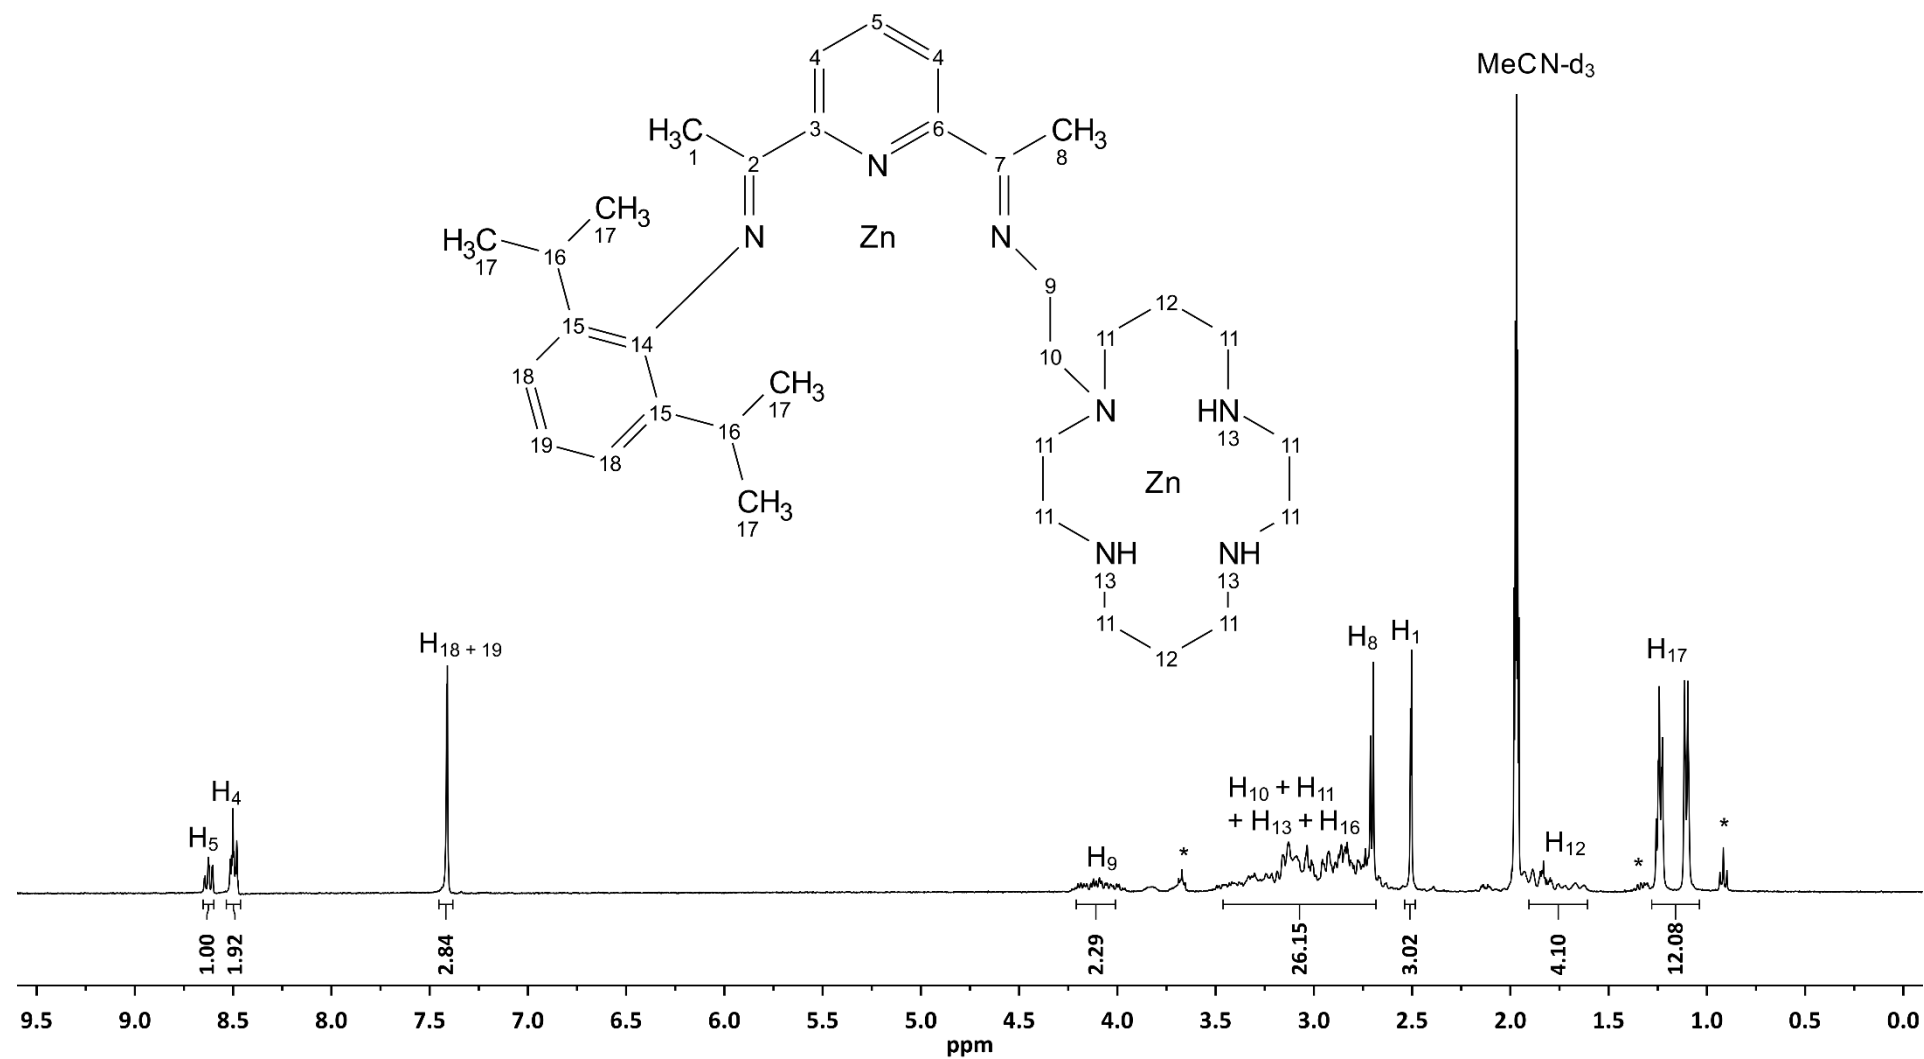

Fig. S3 <sup>1</sup>H NMR spectrum of 5 in MeCN-d<sub>3</sub>; \* = residual solvent.

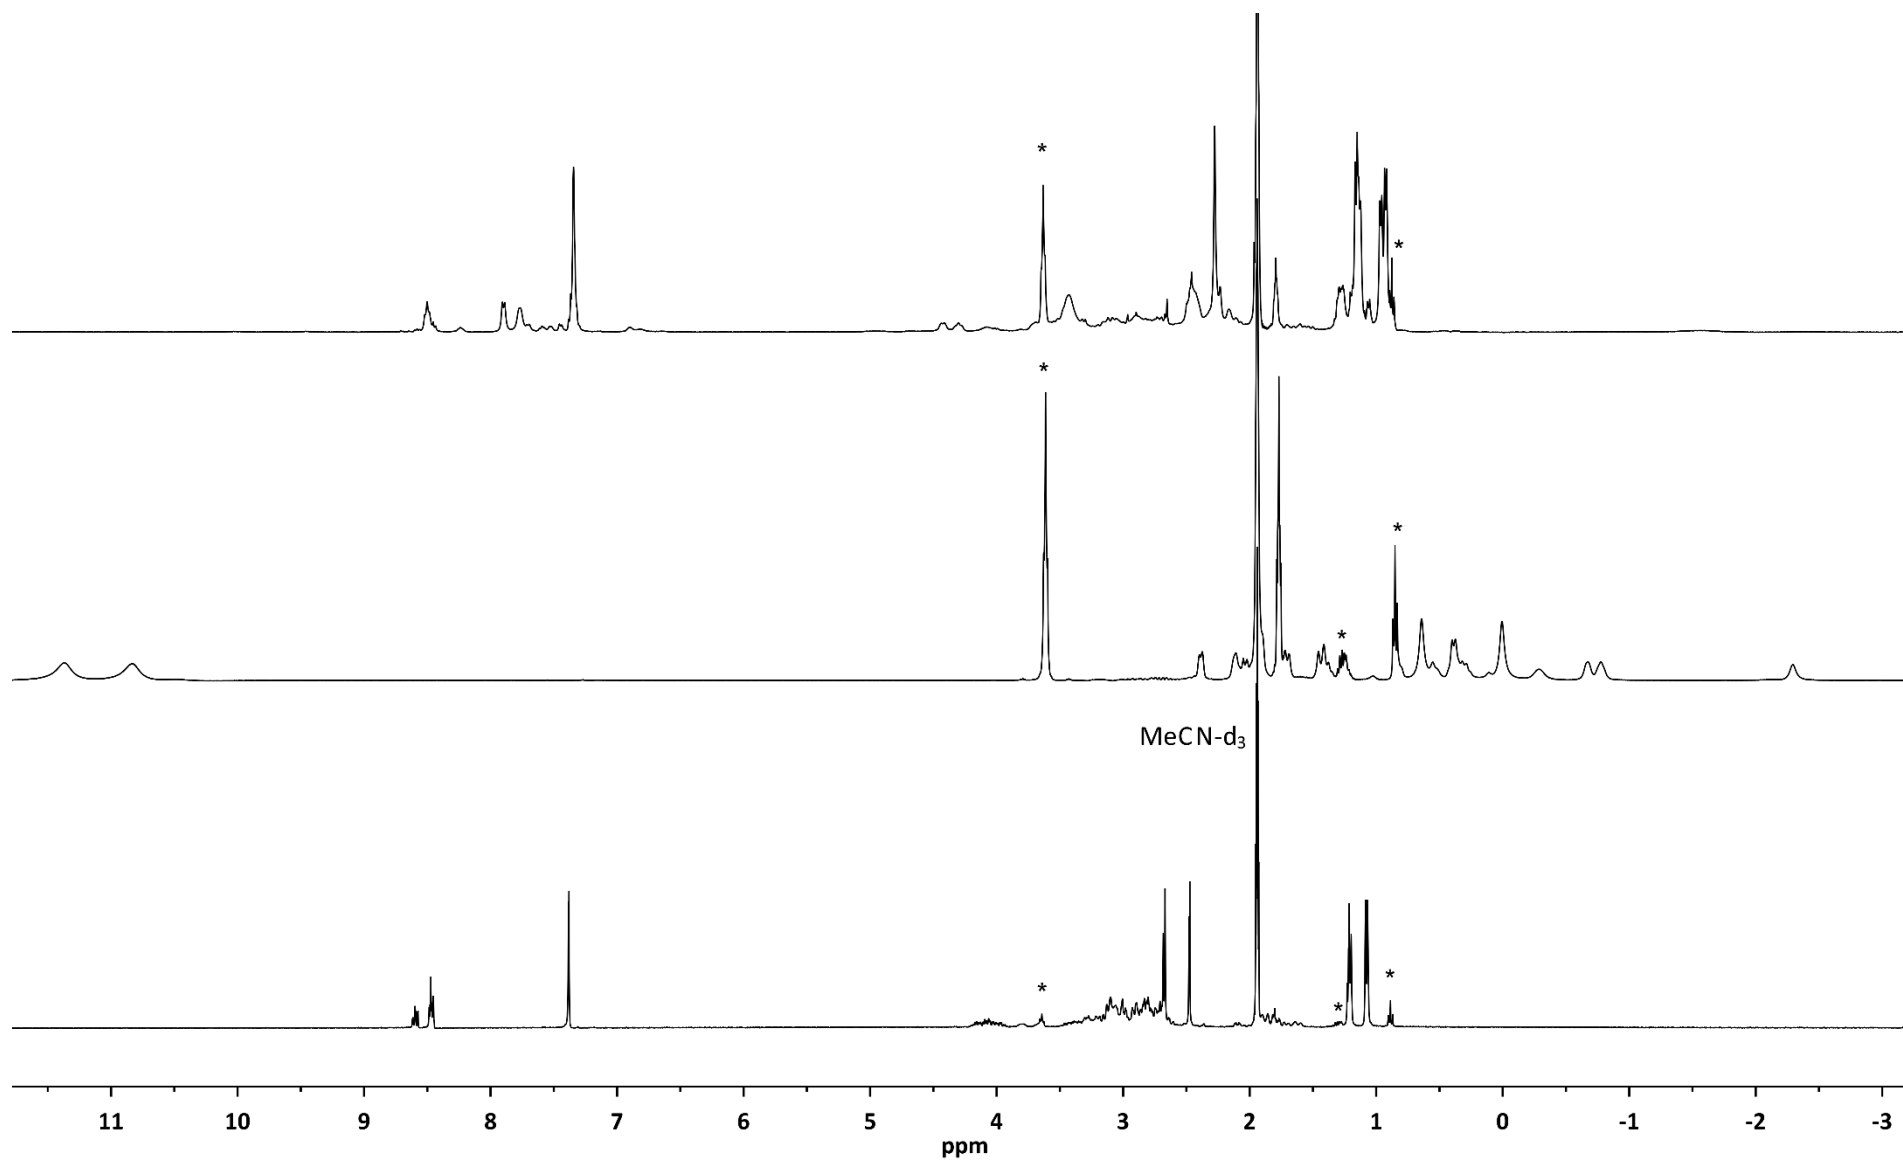

**Fig. S4**  $^1\text{H}$  NMR spectra of **3** (top), **4** (middle) and **5** (bottom) in  $\text{MeCN-d}_3$ ; \* = residual solvent.

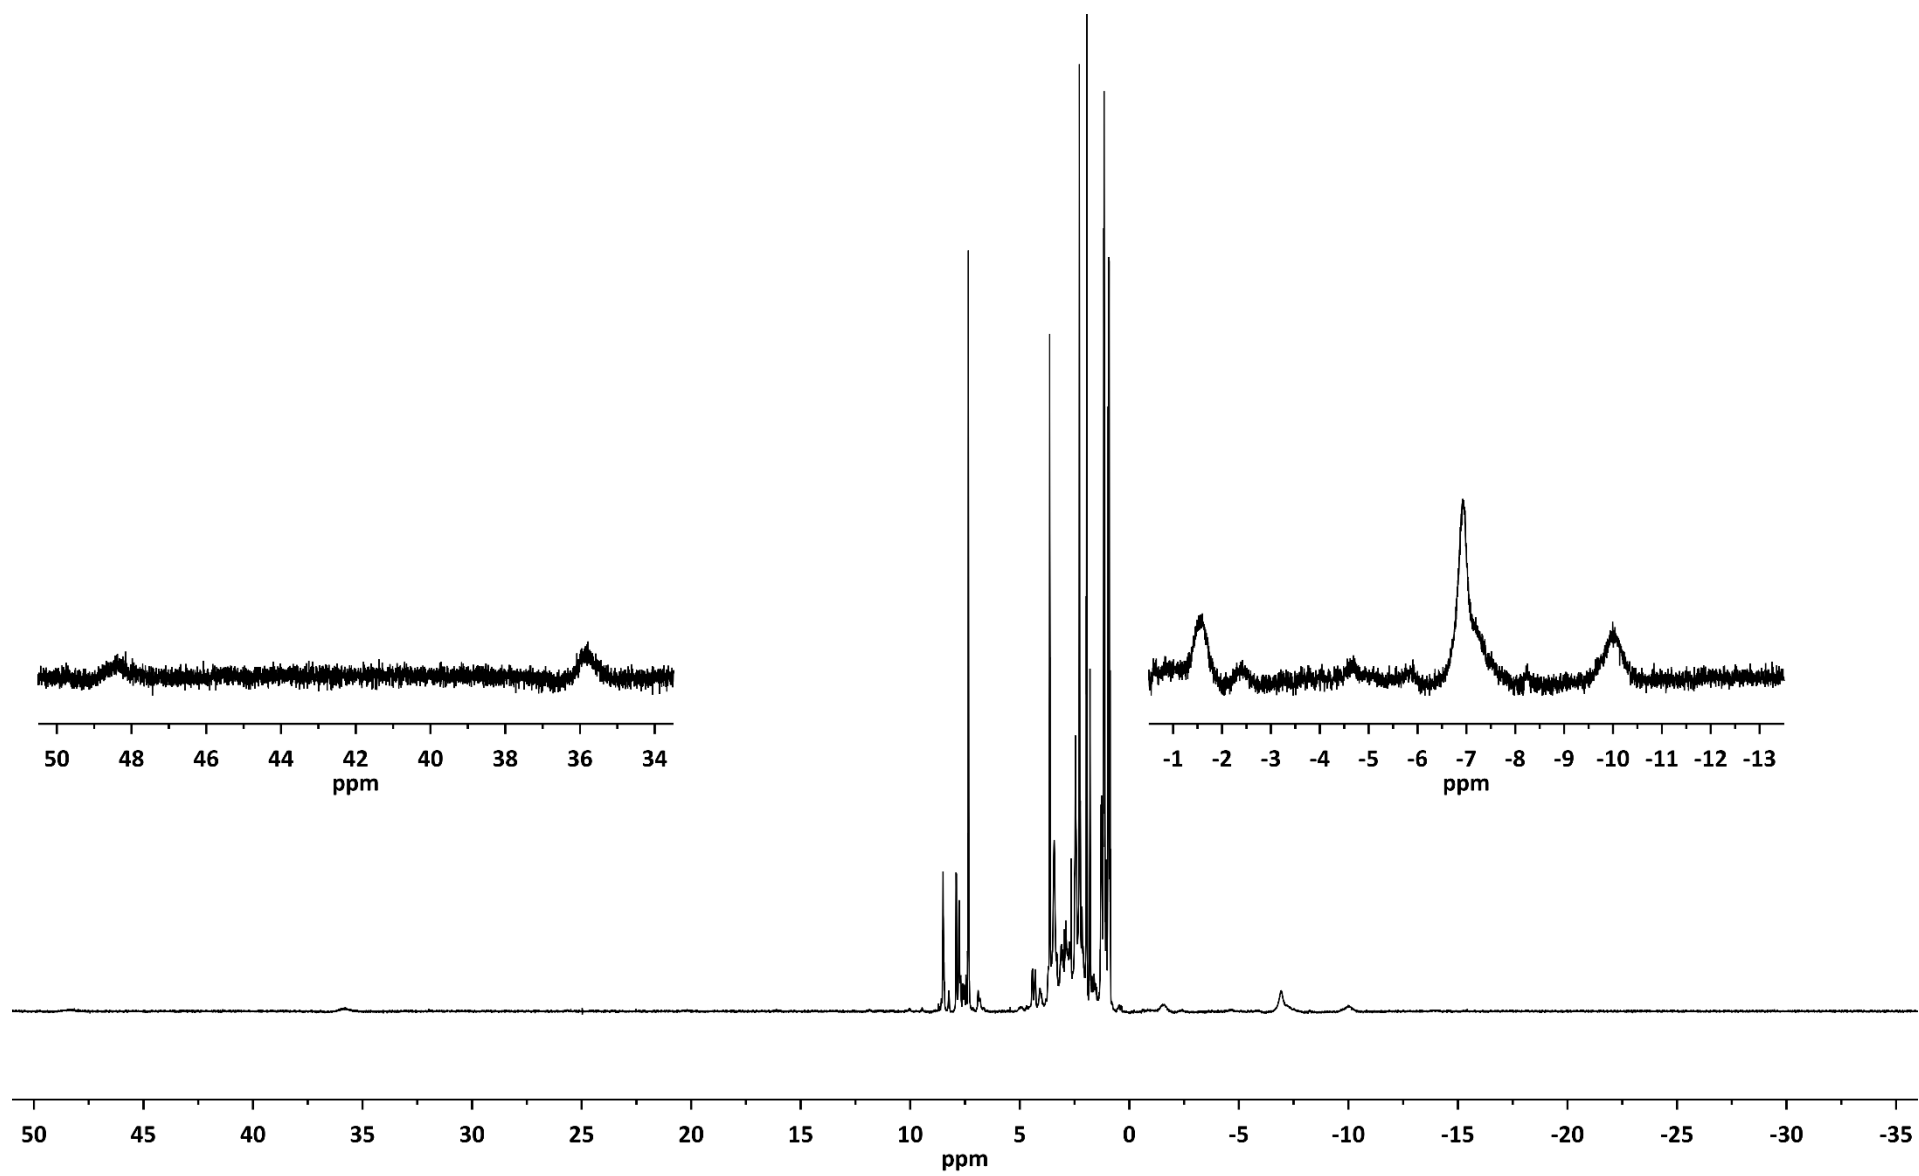

**Fig. S5**  $^1\text{H}$  NMR spectrum of **3** (full spectral region) in  $\text{MeCN-d}_3$ .

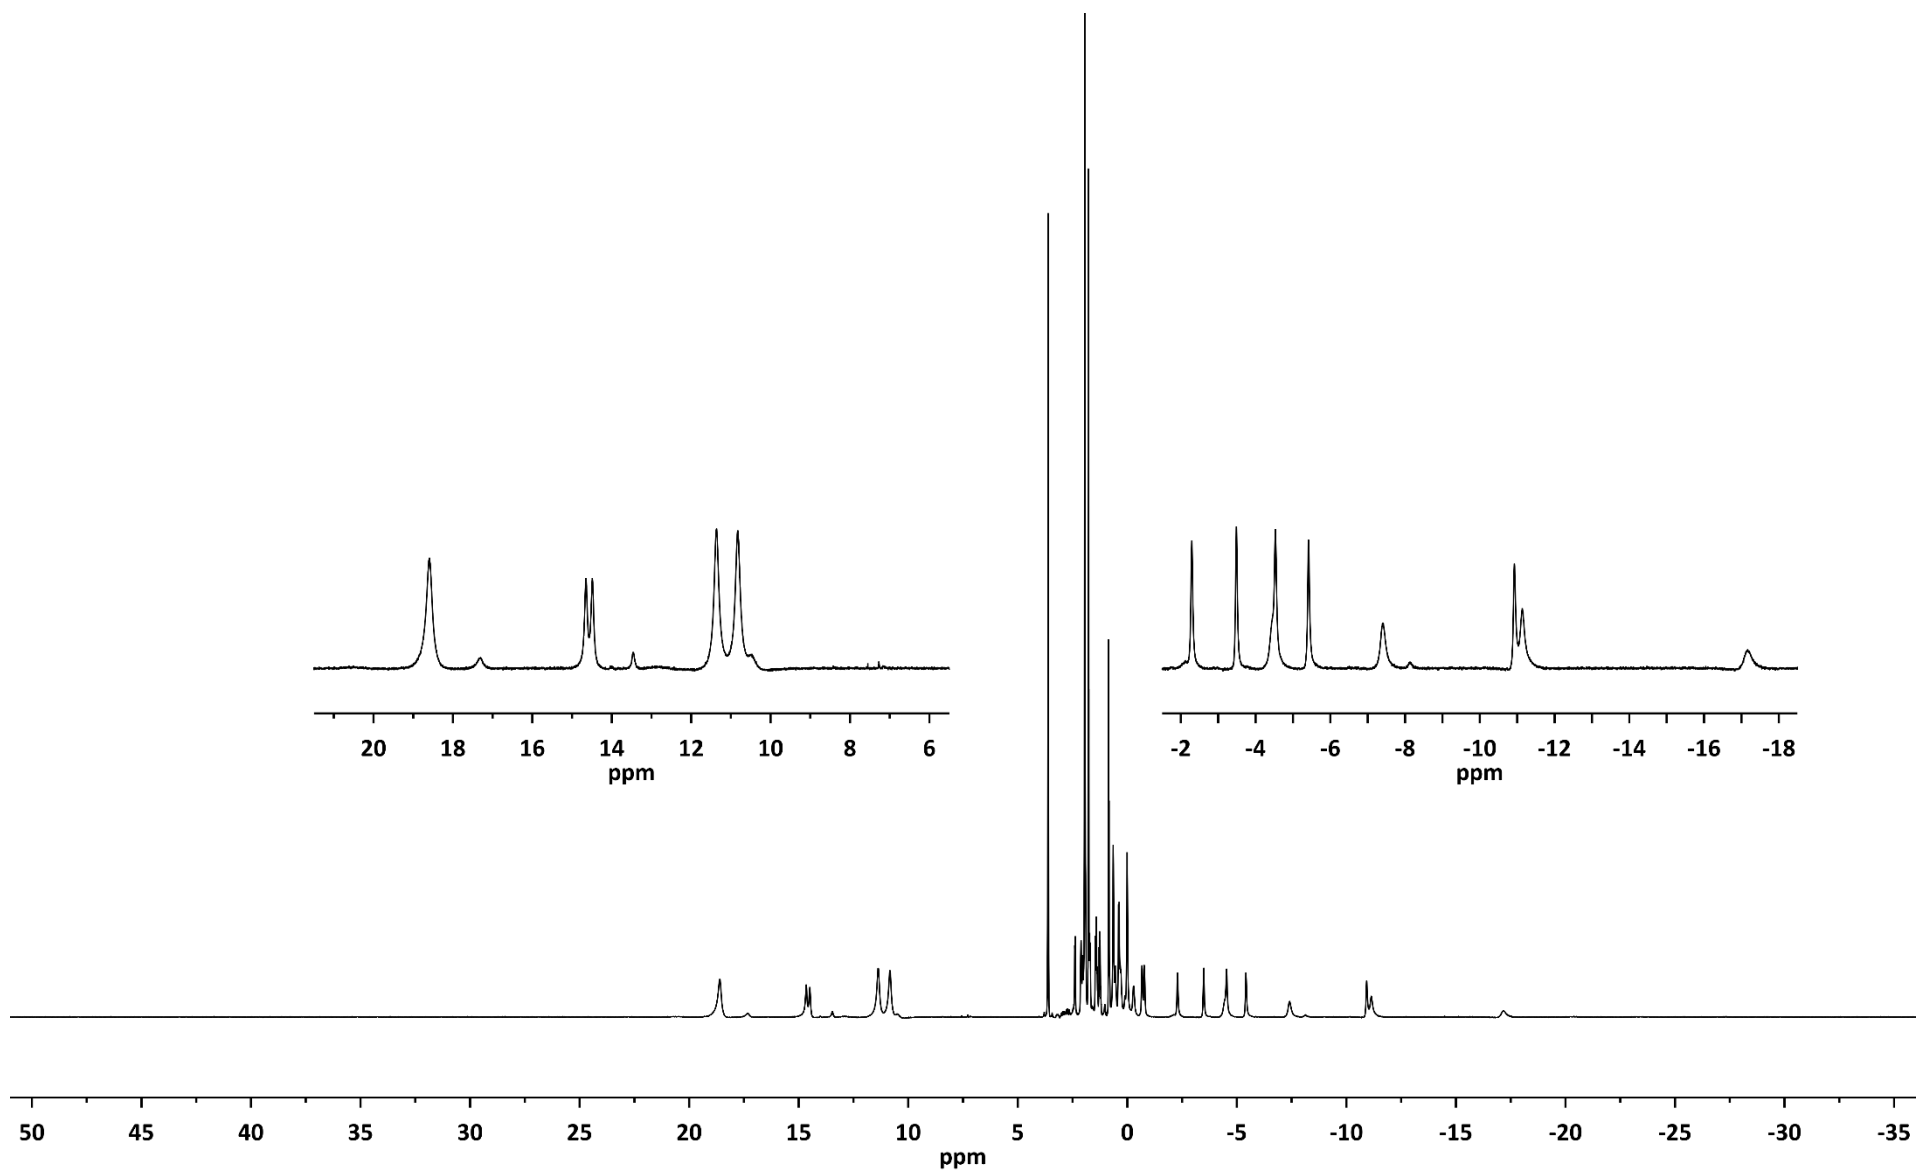

**Fig. S6**  $^1\text{H}$  NMR spectrum of **4** (full spectral region) in  $\text{MeCN-d}_3$ .



## Molecular structures of 5

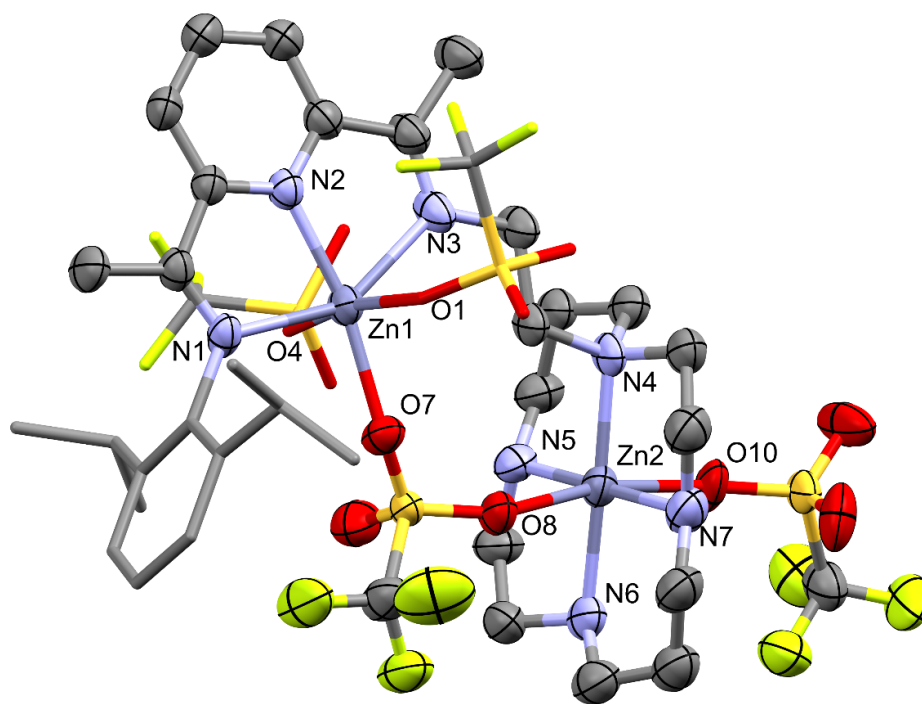

**Fig. S7** Molecular structures of **5**; 50% probability ellipsoids. Hydrogen atoms, solvent molecules and partial disorder are omitted for clarity. Parts of the structure are shown as wireframe for clarity.

**$^1\text{H}$  NMR spectroscopy of 5 with hydrogen peroxide**

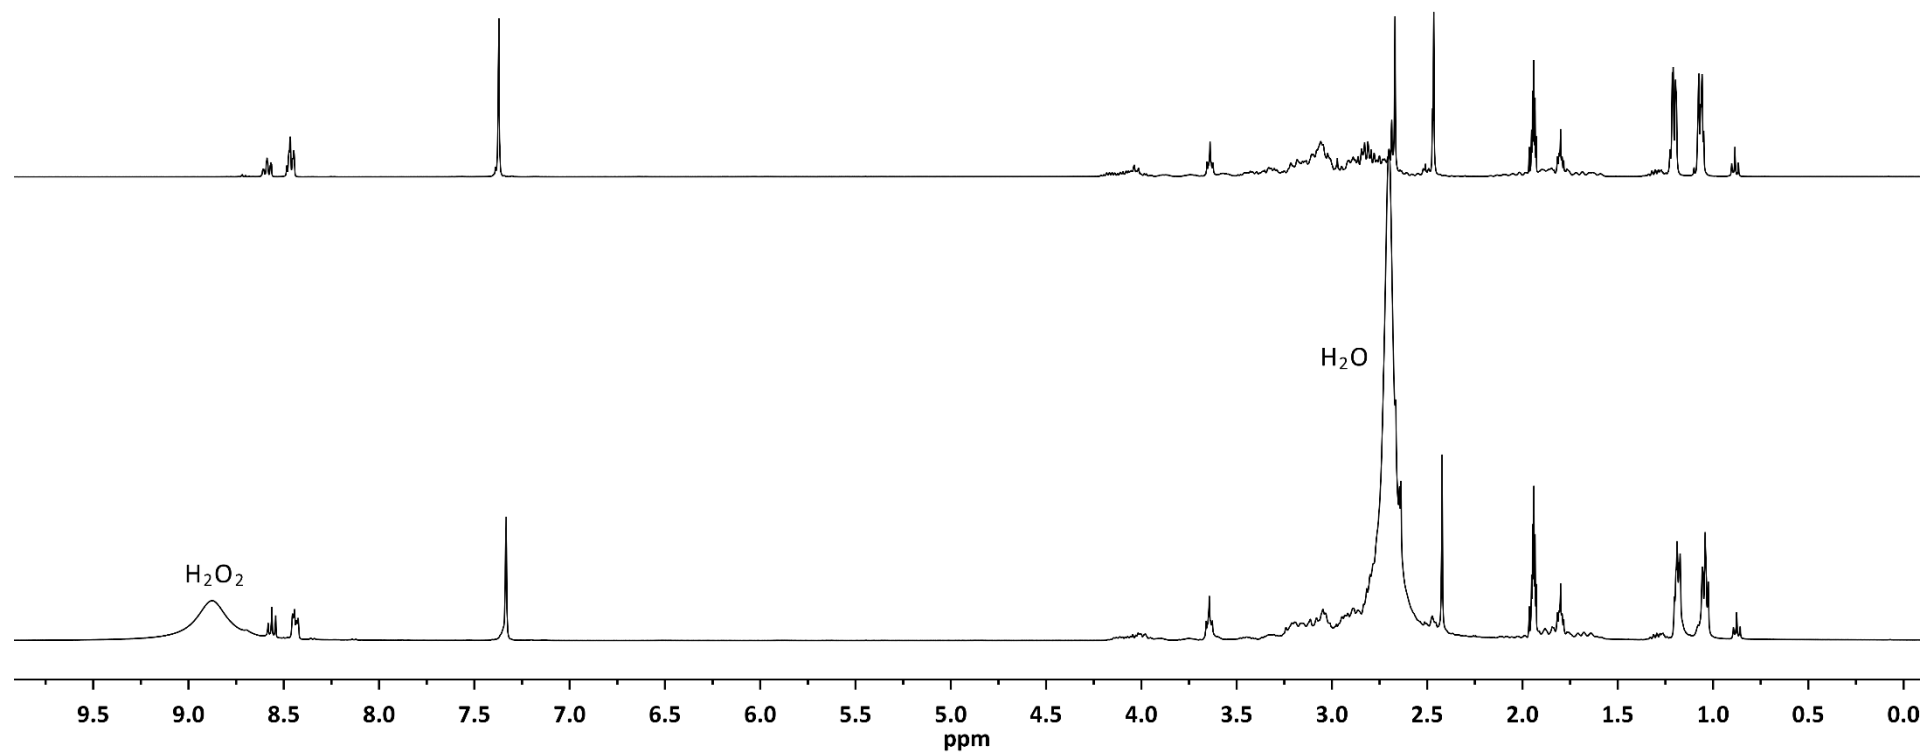

**Fig. S8**  $^1\text{H}$  NMR spectra of a 4 mM solution of 5 in  $\text{CD}_3\text{CN}$  before (top) and after (bottom; 20 min reaction time) addition of 25 equiv. of a 35% aqueous  $\text{H}_2\text{O}_2$  solution.

## Absorption spectrum of **3** with hydrogen peroxide

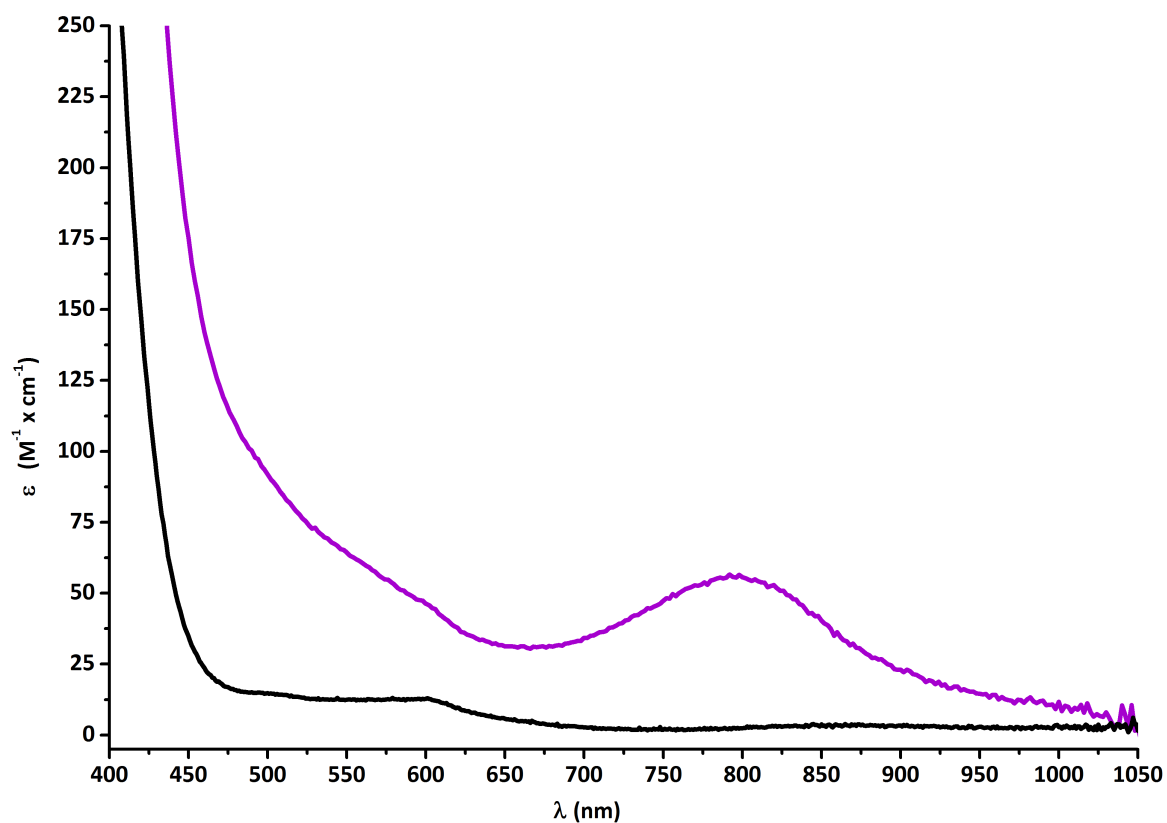

**Fig. S9** Absorption spectrum of a 2 mM solution of **3** in acetone at  $-80$  °C before (black) and after (purple) addition of two equivalents of hydrogen peroxide. The resulting peak at 794 nm is consistent with an iron(IV)-oxo band, as shown by Ray et al. for the  $[\text{Fe}^{\text{IV}}(\text{O})(\text{cyclam})]^{2+}$  species generated under similar conditions.<sup>1</sup>

## Catalytic epoxidation studies

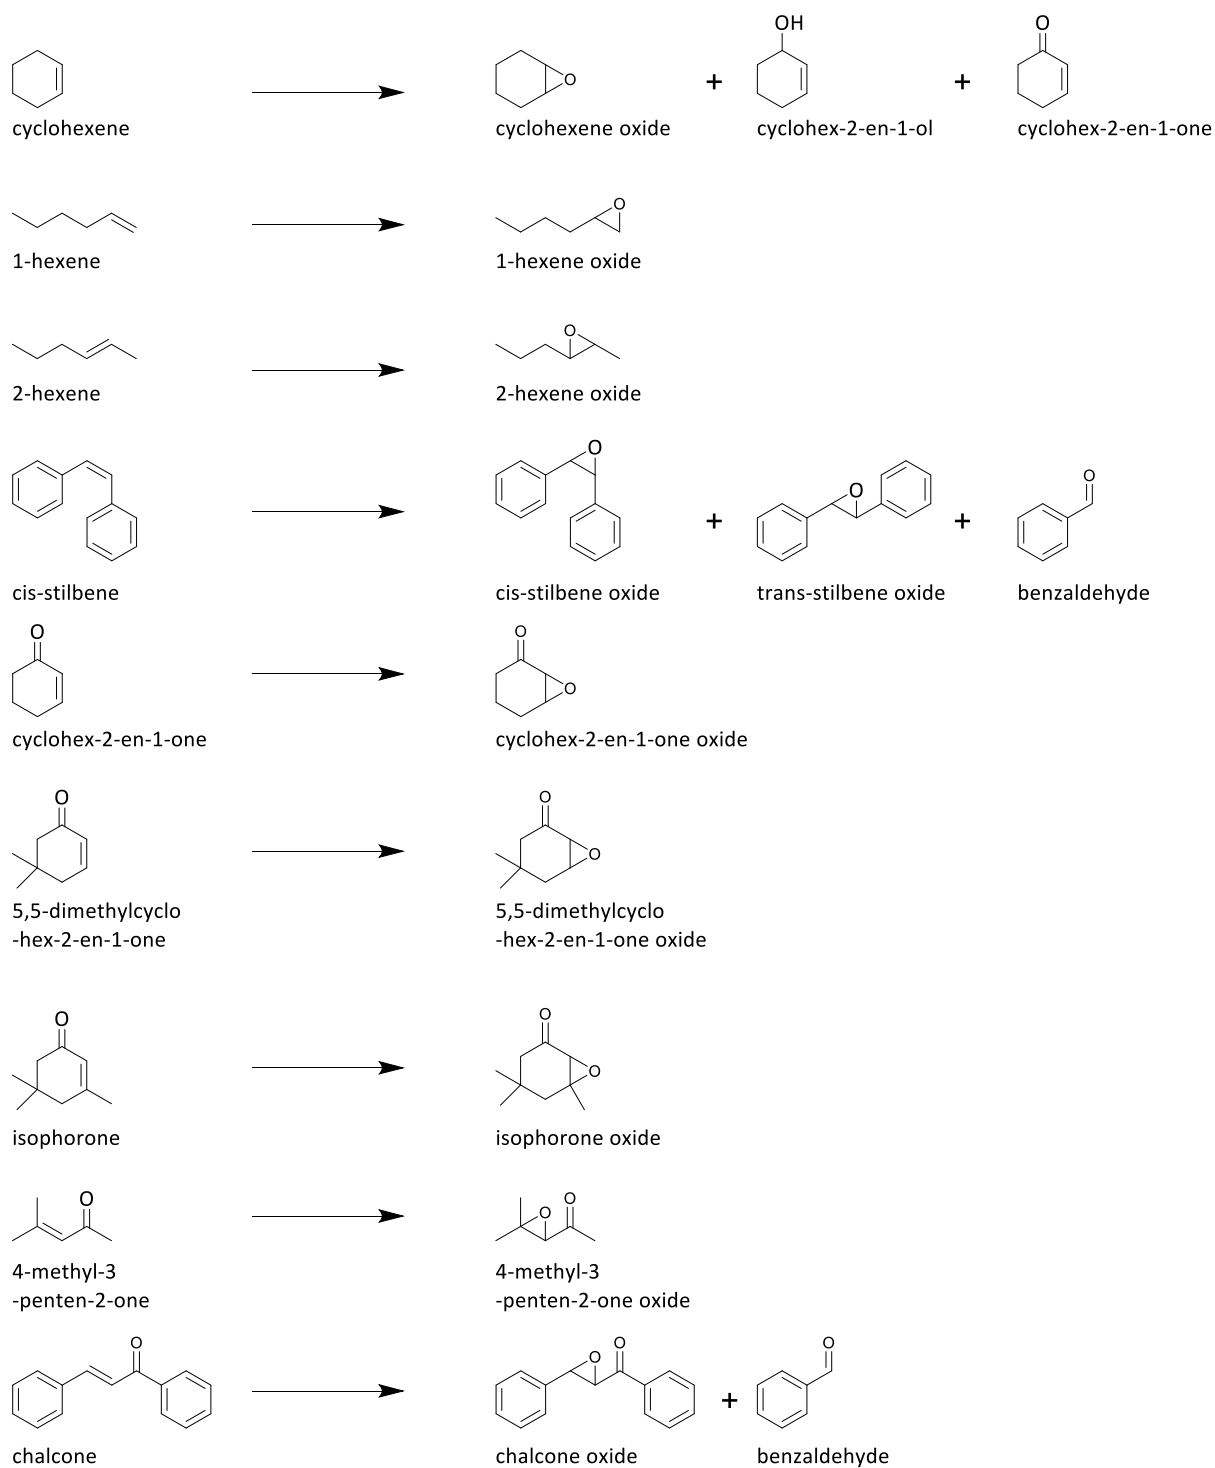

**Chart S1.** Structures of the substrates used in the epoxidation assays, and of the corresponding products.

## Results of epoxidation assays

**Table S1.** Complete list of substrates screened in the epoxidation assays and yields of products, including side-products, generated.

| Entry | Catalyst                                                        | Substrate    | Products                                                          | Epoxide (%) / error                |
|-------|-----------------------------------------------------------------|--------------|-------------------------------------------------------------------|------------------------------------|
| 1     | [Fe(cyclam)OTf <sub>2</sub> ]                                   | cyclohexene  | cyclohexene oxide<br>cyclohex-2-en-1-ol<br>cyclohex-2-en-1-one    | 41 (3)<br>1.0 (0.3)<br>0.5 (0.2)   |
| 2     | <b>1</b>                                                        | cyclohexene  | cyclohexene oxide<br>cyclohex-2-en-1-ol<br>cyclohex-2-en-1-one    | 17 (1)<br>1.4 (0.2)<br>0.8 (0.2)   |
| 3     | <b>2</b>                                                        | cyclohexene  | cyclohexene oxide<br>cyclohex-2-en-1-ol<br>cyclohex-2-en-1-one    | 28 (2)<br>1.2 (0.2)<br>0.9 (0.1)   |
| 4     | <b>3</b>                                                        | cyclohexene  | cyclohexene oxide<br>cyclohex-2-en-1-ol<br>cyclohex-2-en-1-one    | 31 (1)<br>1.3 (0.3)<br>0.8 (0.2)   |
| 5     | <b>4</b>                                                        | cyclohexene  | cyclohexene oxide                                                 | 0                                  |
| 6     | <b>5</b>                                                        | cyclohexene  | cyclohexene oxide                                                 | 0                                  |
| 7     | [( <sup>i</sup> Pr)PDI]Fe(OTf) <sub>2</sub>                     | cyclohexene  | cyclohexene oxide                                                 | 28(1)                              |
| 8     | [Fe(cyclam)OTf <sub>2</sub> ]<br>+ [(PDI)Fe(OTf) <sub>2</sub> ] | cyclohexene  | cyclohexene oxide<br>cyclohex-2-en-1-ol<br>cyclohex-2-en-1-one    | 28(1)<br>1.1 (0.3)<br>0.6 (0.3)    |
| 9     | [Fe(cyclam)OTf <sub>2</sub> ]                                   | 1-hexene     | 1-hexene oxide                                                    | 25 (2)                             |
| 10    | <b>1</b>                                                        | 1-hexene     | 1-hexene oxide                                                    | 24 (0.5)                           |
| 11    | <b>2</b>                                                        | 1-hexene     | 1-hexene oxide                                                    | 31 (1)                             |
| 12    | <b>3</b>                                                        | 1-hexene     | 1-hexene oxide                                                    | 26 (1)                             |
| 13    | [Fe(cyclam)OTf <sub>2</sub> ]                                   | 2-hexene     | 2-hexene oxide                                                    | 35 (1)                             |
| 14    | <b>1</b>                                                        | 2-hexene     | 2-hexene oxide                                                    | 29 (2)                             |
| 15    | <b>2</b>                                                        | 2-hexene     | 2-hexene oxide                                                    | 28(1)                              |
| 16    | <b>3</b>                                                        | 2-hexene     | 2-hexene oxide                                                    | 34 (1)                             |
| 17    | [Fe(cyclam)OTf <sub>2</sub> ]                                   | cis-stilbene | <b>cis-stilbene oxide</b><br>trans-stilbene oxide<br>benzaldehyde | 26 (2)<br>1.9 (0.2)<br>3.5 (0.4)   |
| 18    | <b>1</b>                                                        | cis-stilbene | cis-stilbene oxide<br>trans-stilbene oxide<br>benzaldehyde        | 10 (0.5)<br>0.7 (0)<br>4.0 (0.3)   |
| 19    | <b>2</b>                                                        | cis-stilbene | cis-stilbene oxide<br>trans-stilbene oxide<br>benzaldehyde        | 10 (0.5)<br>1.5 (0.1)<br>3.8 (0.2) |
| 20    | <b>3</b>                                                        | cis-stilbene | cis-stilbene oxide<br>trans-stilbene oxide<br>benzaldehyde        | 20 (1)<br>1.5 (0.2)<br>2.9 (0.2)   |

| Entry | Catalyst                                                        | Substrate                       | Products                              | Epoxide (%) / error   |
|-------|-----------------------------------------------------------------|---------------------------------|---------------------------------------|-----------------------|
| 21    | [Fe(cyclam)OTf <sub>2</sub> ]                                   | cyclohex-2-en-1-one             | cyclohex-2-en-1-one oxide             | 1 (1)                 |
| 22    | <b>1</b>                                                        | cyclohex-2-en-1-one             | cyclohex-2-en-1-one oxide             | 19 (2)                |
| 23    | <b>2</b>                                                        | cyclohex-2-en-1-one             | cyclohex-2-en-1-one oxide             | 22 (0.5)              |
| 24    | <b>3</b>                                                        | cyclohex-2-en-1-one             | cyclohex-2-en-1-one oxide             | 11 (0.5)              |
| 25    | <b>4</b>                                                        | cyclohex-2-en-1-one             | cyclohex-2-en-1-one oxide             | 0                     |
| 26    | <b>5</b>                                                        | cyclohex-2-en-1-one             | cyclohex-2-en-1-one oxide             | 0                     |
| 27    | [(PDI)Fe(OTf) <sub>2</sub> ]                                    | cyclohex-2-en-1-one             |                                       | 0                     |
| 28    | [Fe(cyclam)OTf <sub>2</sub> ]<br>+ [(PDI)Fe(OTf) <sub>2</sub> ] | cyclohex-2-en-1-one             | cyclohex-2-en-1-one oxide             | 3 (0.5)               |
| 29    | [Fe(cyclam)OTf <sub>2</sub> ]                                   | 5,5-dimethylcyclohex-2-en-1-one | 5,5-dimethylcyclohex-2-en-1-one oxide | 1 (1)                 |
| 30    | <b>1</b>                                                        | 5,5-dimethylcyclohex-2-en-1-one | 5,5-dimethylcyclohex-2-en-1-one oxide | 19 (1)                |
| 31    | <b>2</b>                                                        | 5,5-dimethylcyclohex-2-en-1-one | 5,5-dimethylcyclohex-2-en-1-one oxide | 17 (1)                |
| 32    | <b>3</b>                                                        | 5,5-dimethylcyclohex-2-en-1-one | 5,5-dimethylcyclohex-2-en-1-one oxide | 11 (2)                |
| 33    | [Fe(cyclam)OTf <sub>2</sub> ]                                   | isophorone                      | isophorone oxide                      | 17 (0.5)              |
| 34    | <b>1</b>                                                        | isophorone                      | isophorone oxide                      | 35 (2)                |
| 35    | <b>2</b>                                                        | isophorone                      | isophorone oxide                      | 31 (1)                |
| 36    | <b>3</b>                                                        | isophorone                      | isophorone oxide                      | 34 (1)                |
| 37    | [Fe(cyclam)OTf <sub>2</sub> ]                                   | 4-methyl-3-penten-2-one         | 4-methyl-3-penten-2-one oxide         | 6 (0.5)               |
| 38    | <b>1</b>                                                        | 4-methyl-3-penten-2-one         | 4-methyl-3-penten-2-one oxide         | 23 (2)                |
| 39    | <b>2</b>                                                        | 4-methyl-3-penten-2-one         | 4-methyl-3-penten-2-one oxide         | 25 (1)                |
| 40    | <b>3</b>                                                        | 4-methyl-3-penten-2-one         | 4-methyl-3-penten-2-one oxide         | 18 (0.5)              |
| 41    | [Fe(cyclam)OTf <sub>2</sub> ]                                   | chalcone                        | chalcone oxide<br>benzaldehyde        | 15 (2)<br>2.9 (0.1)   |
| 42    | <b>1</b>                                                        | chalcone                        | chalcone oxide<br>benzaldehyde        | 19 (1)<br>4.2 (0.4)   |
| 43    | <b>2</b>                                                        | chalcone                        | chalcone oxide<br>benzaldehyde        | 21 (0.5)<br>4.7 (0.4) |
| 44    | <b>3</b>                                                        | chalcone                        | chalcone oxide<br>benzaldehyde        | 21 (3)<br>4.1 (0.3)   |

## Product analysis

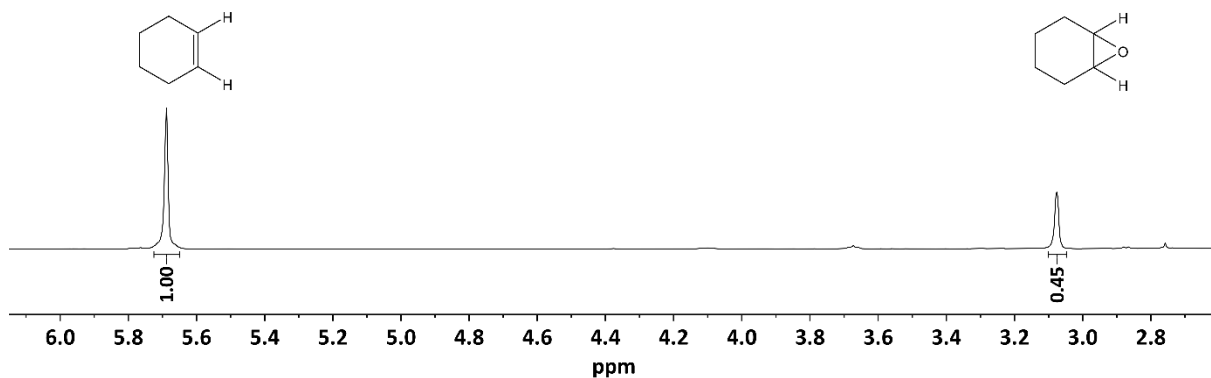

**Fig. S10** Representative <sup>1</sup>H NMR spectrum of cyclohexene in CD<sub>3</sub>CN after the reaction with **3** under the catalytic conditions.

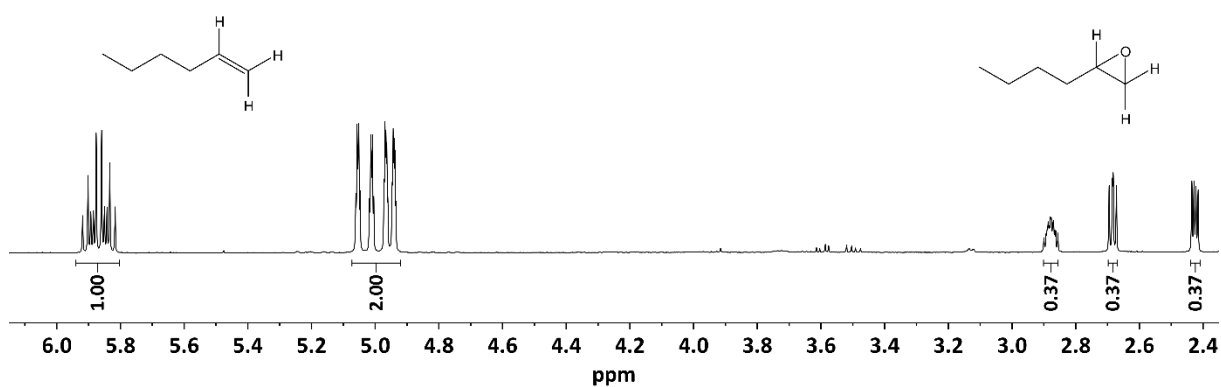

**Fig. S11** Representative <sup>1</sup>H NMR spectrum of 1-hexene in CD<sub>3</sub>CN after the reaction with **3** under the catalytic conditions.

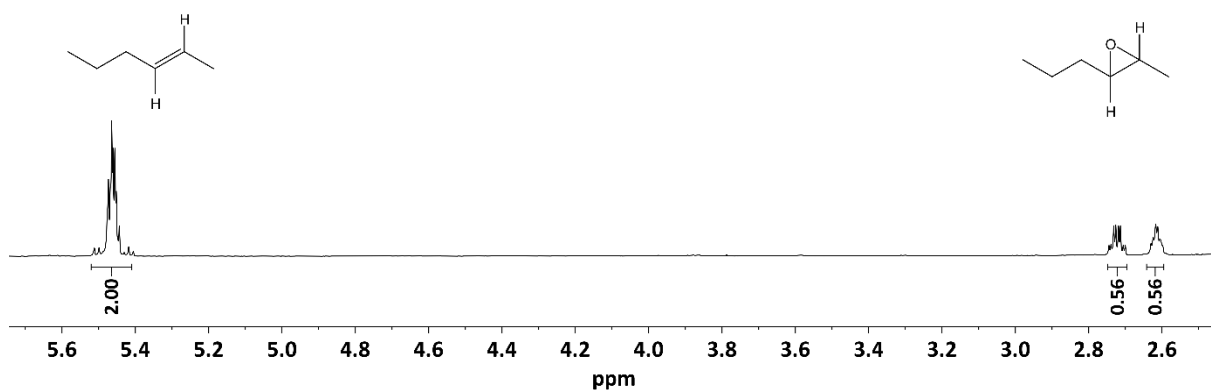

**Fig. S12** Representative <sup>1</sup>H NMR spectrum of 2-hexene in CD<sub>3</sub>CN after the reaction with **3** under the catalytic conditions.

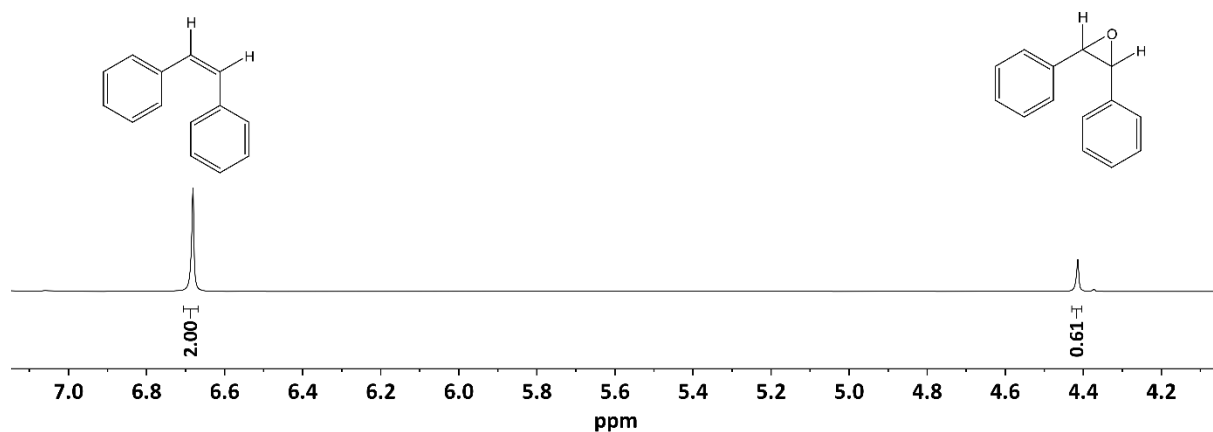

**Fig. S13** Representative <sup>1</sup>H NMR spectrum of cis-stilbene in CD<sub>3</sub>CN after the reaction with **3** under the catalytic conditions.

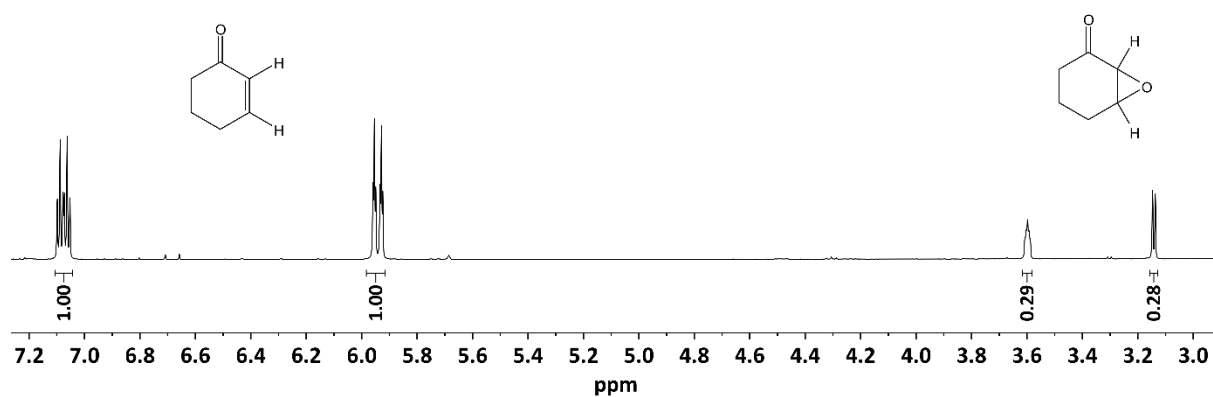

**Fig. S14** Representative <sup>1</sup>H NMR spectrum of cyclohex-2-en-1-one in CD<sub>3</sub>CN after the reaction with **1** under the catalytic conditions.

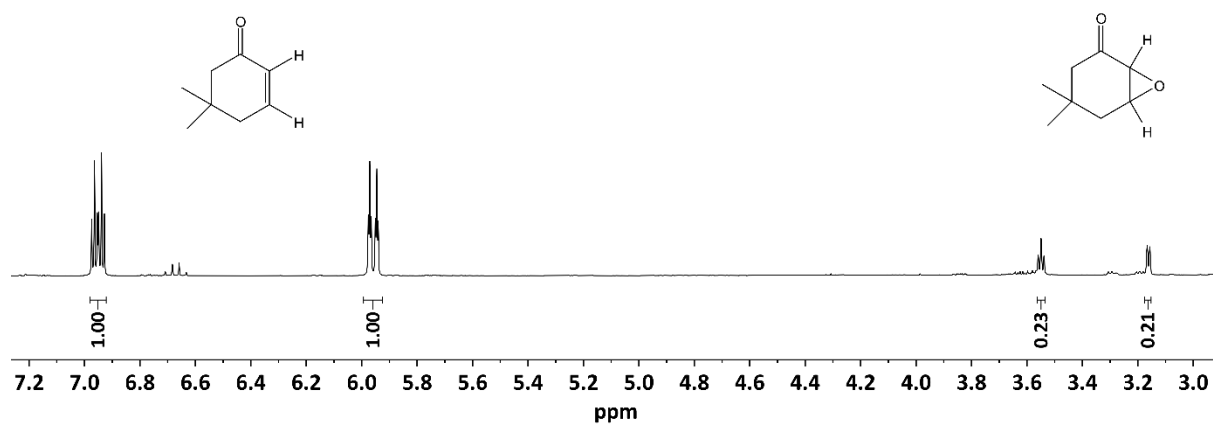

**Fig. S15** Representative <sup>1</sup>H NMR spectrum of 5,5-dimethylcyclohex-2-en-1-one in CD<sub>3</sub>CN after the reaction with **1** under the catalytic conditions.



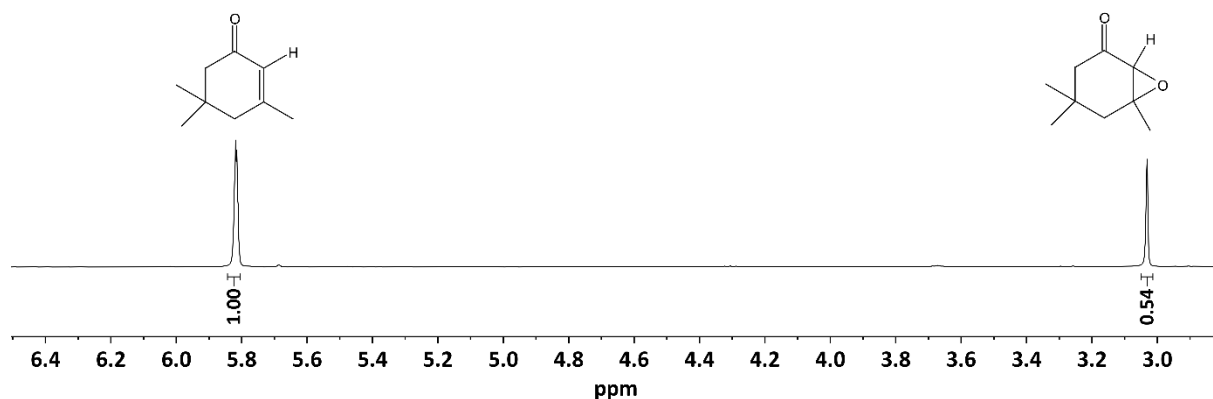

**Fig. S16** Representative <sup>1</sup>H NMR spectrum of isophorone in CD<sub>3</sub>CN after the reaction with **1** under the catalytic conditions.

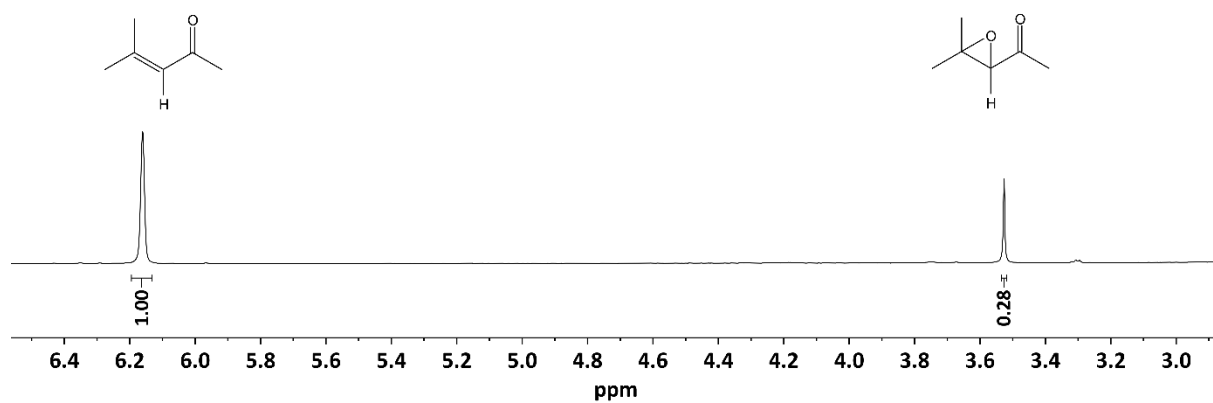

**Fig. S17** Representative <sup>1</sup>H NMR spectrum of 4-methyl-3-penten-2-one in CD<sub>3</sub>CN after the reaction with **1** under the catalytic conditions.

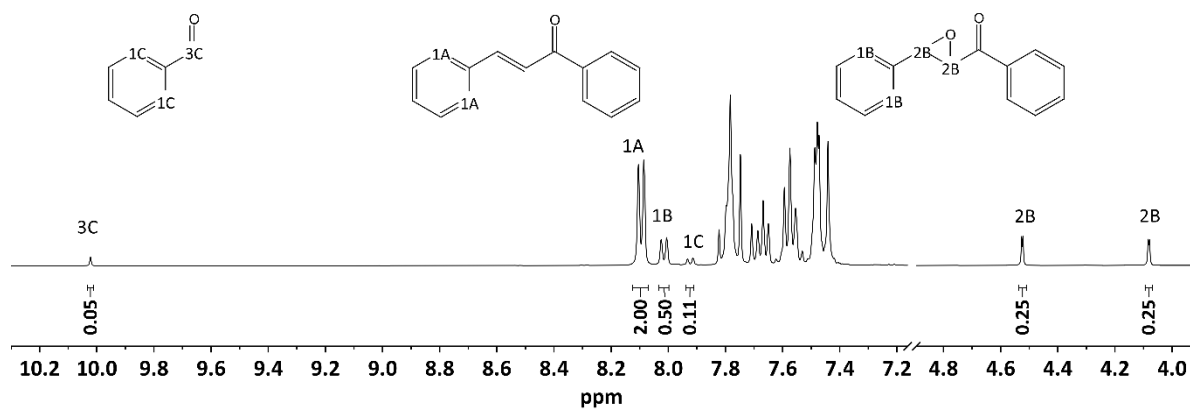

**Fig. S18** Representative <sup>1</sup>H NMR spectrum of chalcone in CD<sub>3</sub>CN after the reaction with **3** under the catalytic conditions.

## Crystallographic tables

**Table S2.** Crystallographic data for **4** and **5**.

|                                             | <b>4</b>                                                                                           | <b>5</b>                                                                                                      |
|---------------------------------------------|----------------------------------------------------------------------------------------------------|---------------------------------------------------------------------------------------------------------------|
| Empirical formula                           | C <sub>37</sub> H <sub>53</sub> F <sub>12</sub> FeN <sub>7</sub> O <sub>12</sub> S <sub>4</sub> Zn | C <sub>37</sub> H <sub>53</sub> F <sub>12</sub> N <sub>7</sub> O <sub>12</sub> S <sub>4</sub> Zn <sub>2</sub> |
| Formula weight                              | 1265.29                                                                                            | 1274.84                                                                                                       |
| Crystal system                              | Triclinic                                                                                          | Triclinic                                                                                                     |
| Space group                                 | P -1                                                                                               | P -1                                                                                                          |
| a (Å)                                       | 12.6710(9)                                                                                         | 12.8764(16)                                                                                                   |
| b (Å)                                       | 15.7641(12)                                                                                        | 15.6215(19)                                                                                                   |
| c (Å)                                       | 15.7646(12)                                                                                        | 15.7745(19)                                                                                                   |
| α (°)                                       | 71.790(2)                                                                                          | 71.766(5)                                                                                                     |
| β (°)                                       | 80.340(3)                                                                                          | 77.414(5)                                                                                                     |
| γ (°)                                       | 77.624(3)                                                                                          | 80.424(5)                                                                                                     |
| Volume (Å <sup>3</sup> )                    | 2904.4(4)                                                                                          | 2924.7(6)                                                                                                     |
| Z                                           | 2                                                                                                  | 2                                                                                                             |
| ρ <sub>calc</sub> (mg mm <sup>-3</sup> )    | 1.447                                                                                              | 1.448                                                                                                         |
| μ (mm <sup>-1</sup> )                       | 0.901                                                                                              | 1.057                                                                                                         |
| F (000)                                     | 1296                                                                                               | 1304                                                                                                          |
| Reflns. collected                           | 87726                                                                                              | 79287                                                                                                         |
| Indep. reflns/R <sub>int</sub>              | 10626                                                                                              | 10709                                                                                                         |
| Data/restraints/param                       | 10626/766/893                                                                                      | 10709/1623/1077                                                                                               |
| GOF on F <sup>2</sup>                       | 1.034                                                                                              | 1.056                                                                                                         |
| Final R <sub>1</sub> indexes [I ≥ 2σ(I)]    | 0.0803                                                                                             | 0.0734                                                                                                        |
| Final wR <sub>2</sub> indexes (all data)    | 0.2129                                                                                             | 0.2260                                                                                                        |
| Δρ <sub>min</sub> /max (e Å <sup>-3</sup> ) | 1.658 and -1.244                                                                                   | 1.188 and -0.936                                                                                              |
| CCDC number                                 | 2030817                                                                                            | 2030816                                                                                                       |

**Table S3.** Select bond distances (Å) and angles (°) for **4** and **5**. Multiple entries are due to disorder.

|           | <b>4</b>                       |           | <b>5</b>            |
|-----------|--------------------------------|-----------|---------------------|
| Fe1...Zn1 | 5.598(1)                       | Zn1...Zn2 | 5.634(1)            |
| Fe1-O1    | 2.236(7)(2.010(12), 2.100(10)) | Zn1-O1    | 2.108(4)            |
| Fe1-O4    | 2.2119(5)                      | Zn1-O4    | 2.15(3)             |
| Fe1-O7    | 1.934(7)(2.171(6))             | Zn1-O7    | 2.111(6)(1.922(14)) |
| Fe1-N1    | 2.245(4)                       | Zn1-N1    | 2.264(4)            |
| Fe1-N2    | 2.097(4)                       | Zn1-N2    | 2.052(4)            |
| Fe1-N3    | 2.243(5)                       | Zn1-N3    | 2.225(4)            |
| Zn1-O8    | 2.358(8)                       | Zn2-O8    | 2.356(11)           |
| Zn1-O10   | 2.352(4)                       | Zn2-O10   | 2.361(4)            |
| Zn1-N4    | 2.128(5)                       | Zn2-N4    | 2.108(6)(2.240(14)) |
| Zn1-N5    | 2.077(5)                       | Zn2-N5    | 2.095(7)(2.016(16)) |
| Zn1-N6    | 2.100(6)                       | Zn2-N6    | 2.141(7)(2.014(15)) |
| Zn1-N7    | 2.058(7)                       | Zn2-N7    | 2.061(7)(2.143(16)) |
| N1-Fe1-N2 | 73.92(16)                      | N1-Zn1-N2 | 75.05(16)           |
| N2-Fe1-N3 | 73.80(17)                      | N2-Zn1-N3 | 75.50(17)           |
| N4-Zn1-N5 | 90.5(2)                        | N4-Zn2-N5 | 92.5(2)(90.8(6))    |
| N5-Zn1-N6 | 86.3(3)                        | N5-Zn2-N6 | 84.4(3)(89.4(6))    |
| N6-Zn1-N7 | 93.7(3)                        | N6-Zn2-N7 | 94.6(3)(96.6(6))    |
| N4-Zn1-N7 | 89.5(3)                        | N4-Zn2-N7 | 88.5(3)(83.2(6))    |

## References

- 1 X. Engelmann, D. D. Malik, T. Corona, K. Warm, E. R. Farquhar, M. Swart, W. Nam and K. Ray, *Angew. Chem. Int. Ed.*, 2019, **58**, 4012-4016.
